# Supplementary material
Source: PubMed Central journal article supplement (PMC5623598)
Supplement: NIHMS861653-supplement-supplement_1.pdf [file NIHMS861653-supplement-supplement_1.pdf]

**SUPPLEMENTARY APPENDIX**

This appendix has been provided by the authors to give readers additional information about their work.

Supplement to: JA Cohen et al. Pilot trial of intravenous autologous culture-expanded mesenchymal stem cell transplantation in multiple sclerosis.

TABLE OF CONTENTS

|   |                       |   |
|---|-----------------------|---|
| 1 | STUDY OVERSIGHT ..... | 2 |
| 2 | MRI PROTOCOL .....    | 3 |

1 STUDY OVERSIGHT

Steering Committee

Jeffrey A Cohen, MD (Chair), Mellen Center, Neurological institute, Cleveland Clinic  
Elizabeth Fisher, PhD, Biomedical Engineering, Lerner Research Institute, Cleveland Clinic <sup>a</sup>  
Stanton L Gerson, MD, Case Comprehensive Cancer Center, and National Center for  
Regenerative Medicine, Case Western Reserve University; Seidman Cancer Center,  
University Hospitals Cleveland Medical Center  
Peter B Imrey, PhD, Quantitative Health Sciences, Lerner Research Institute, and Mellen  
Center, Neurological Institute, Cleveland Clinic  
Hillard M Lazarus, MD, Case Comprehensive Cancer Center, and National Center for  
Regenerative Medicine, Case Western Reserve University; Seidman Cancer Center,  
University Hospitals Cleveland Medical Center  
Jane Reese Koc, MBA, Case Comprehensive Cancer Center, and National Center for  
Regenerative Medicine, Case Western Reserve University; Seidman Cancer Center,  
University Hospitals Cleveland Medical Center

Medical Monitor

Robert J. Fox, MD, Mellen Center, Neurological institute, Cleveland Clinic

Data Safety Monitoring Committee

Stephen C. Reingold, PhD (Chair), Scientific and Clinical Review Associates  
Jack P Antel, MD, Montreal Neurological Institute, McGill University  
Gary R Cutter, PhD, Department of Biostatistics, School of Public Health, University of  
Alabama-Birmingham  
Andrew D. Goodman, MD, Department of Neurology, University of Rochester Medical Center  
Marcelo Pasquini, MD, Division of Neoplastic Diseases and Related Disorders, Medical College  
of Wisconsin

Advisory Committee

Arnold Caplan, PhD, Departments of Biology and General Medical Sciences, Case Western  
Reserve University  
Robert Miller, PhD, Departments of Biology and General Medical Sciences, Case Western  
Reserve University School of Medicine <sup>b</sup>  
Michael D Phillips, MD, Imaging Sciences, Imaging Institute, Cleveland Clinic  
Richard A Rudick, MD, Mellen Center, Neurological institute, Cleveland Clinic <sup>a</sup>

<sup>a</sup> Current affiliation: Biogen

<sup>b</sup> Current affiliation: School of Medicine and Health Sciences, George Washington University

## 2 MRI PROTOCOL

Over the course of the study, up to 7 MRI studies were acquired for each participant.

All images were acquired on the same **3T scanner** for all patients at each time point. The sequences acquired for this study included a SPACE 3D FLAIR, a 3D Turboflash series with and without an MT saturation pulse, a 30-direction DTI series, T1-weighted MPRAGE, and T1-weighted FLASH images with and without contrast. Each study scan was reviewed for acceptable image quality by the analysis center prior to approval. If a scan was not approved, due to excessive patient motion, for example, it was repeated.

Prior to scanning the first participant for this study, a test image set (i.e., “dummy scan”) was approved by the analysis center in order to verify that the protocol was set up correctly.

Images were acquired in an axial or oblique axial orientation with the slices parallel to the inferior aspect of the corpus callosum. The angle of the slice planes was determined using a standard scout scan. For each participant, a sufficient number of slices was planned to guarantee complete coverage of the brain, including the cerebellum. The most superior and inferior slices did not contain brain tissue.

| <b>MS-MS MRI Protocol</b>                 |                                    |                                                                                 |                                    |
|-------------------------------------------|------------------------------------|---------------------------------------------------------------------------------|------------------------------------|
| <b>Image Type</b>                         | <b>Sequence times (ms)</b>         | <b>Sequence details</b>                                                         | <b>Voxel size (mm<sup>3</sup>)</b> |
| SPACE 3D FLAIR                            | TR = 6500<br>TE = 404<br>TI = 2000 | flip angle = variable                                                           | 1.0 x 1.0 x 1.4                    |
| 3D Turboflash without MT saturation pulse | TR = 24<br>TE = 3.81               | flip angle = 10                                                                 | 1 x 0.8 x 1                        |
| 3D Turboflash with MT saturation pulse    | TR = 24<br>TE = 3.81               | flip angle = 10; MT pulse: Gaussian, 2 kHz off resonance                        | 1 x 0.8 x 1                        |
| 30-direction DTI                          | TR = 7000<br>TE = 95               | b=1000s/mm <sup>2</sup>                                                         | 2 x 2 x 2                          |
| T1-weighted MPRAGE                        | TR = 1860<br>TE = 2.8<br>TI = 1100 | flip angle = 10                                                                 | 0.9 x 0.9 x 0.9                    |
| T1-weighted FLASH without contrast        | TR = 300<br>TE = 2.45              |                                                                                 | 0.7 x 0.8 x 3                      |
| T1-weighted FLASH with contrast           | TR = 300<br>TE = 2.45              | Acquired 5 minutes after injection of gadolinium-DTPA (0.1 mmol/kg body weight) | 0.7 x 0.8 x 3                      |

The images were evaluated at the Cleveland Clinic MS-MRI Analysis Center using automated image analysis software developed in-house. The quantitative MRI parameters measured included:

- Number and volume of gadolinium-enhancing lesions
- Number of new or enlarged T2-hyperintense lesions
- Volume of T2-hyperintense lesions

- Volume of non-enhancing T1-hypointense lesions
- Brain parenchymal fraction and gray matter fraction
- Diffusions tensor imaging: whole brain mean diffusivity and fractional anisotropy
- Whole brain magnetization transfer ratio
